# Supplementary material for: A Decision Support System for Drinking Water Production Integrating Health Risks Assessment
Source: Int J Environ Res Public Health. 2014 Jul 18;11(7):7354–75. doi: 10.3390/ijerph110707354 (PMC4113881; doi:10.3390/ijerph110707354)
Supplement: Supplementary File 1 — Supplementary Information (PDF, 359 KB) [file ijerph-11-07354-s001.pdf]

# A Decision Support System for Drinking Water Production Integrating Health Risks Assessment

**Table S1.** Anthropized catchment Risk Assessment.

| Item                                        | Factor                                                                   | Choice                                                   | Risk Score |
|---------------------------------------------|--------------------------------------------------------------------------|----------------------------------------------------------|------------|
| Animals                                     | Cattle/calves livestock unit per ha of forage area (LDI *)               | Absence                                                  | 0          |
|                                             |                                                                          | ≤1                                                       | 1          |
|                                             |                                                                          | >1                                                       | 3          |
|                                             | Sheep/lambs livestock unit per ha of forage area (LDI *)                 | Absence                                                  | 0          |
|                                             |                                                                          | ≤1                                                       | 1          |
|                                             |                                                                          | >1                                                       | 3          |
|                                             | Pig livestock unit per ha of forage area (LDI *)                         | Absence                                                  | 0          |
|                                             |                                                                          | ≤1                                                       | 1          |
|                                             |                                                                          | >1                                                       | 3          |
|                                             | Poultry livestock unit per ha of forage area (LDI *)                     | Absence                                                  | 0          |
|                                             |                                                                          | ≤1                                                       | 1          |
|                                             |                                                                          | >1                                                       | 3          |
| Agricultural practices within the catchment | Any other farmed animals or birds                                        | Absence                                                  | 0          |
|                                             |                                                                          | Presence                                                 | 1          |
|                                             | Evidence of wildlife around the catchment                                | Absence                                                  | 0          |
|                                             |                                                                          | Presence                                                 | 2          |
|                                             | Animals access to water sources including feeder streams                 | No access (natural or artificial barrier)                | 0          |
|                                             |                                                                          | Access possible at a distance > 200 m from the catchment | 1          |
|                                             |                                                                          | Access possible at a distance < 200 m from the catchment | 3          |
|                                             | Farm waste (Slurry/Dung) or sewage sludge spreading within the catchment | Absence                                                  | 0          |
|                                             |                                                                          | Presence                                                 | 3          |
|                                             | Slurry/dung open stores                                                  | Absence                                                  | 0          |
|                                             |                                                                          | Presence                                                 | 3          |
|                                             | Cultivated lands with crops                                              | Absence                                                  | 0          |
|                                             |                                                                          | <20%                                                     | 1          |
|                                             |                                                                          | 20%–50%                                                  | 2          |
|                                             |                                                                          | >50%                                                     | 3          |

Table S1. Cont.

| Item                                               | Factor                                                                                       | Choice         | Risk Score |
|----------------------------------------------------|----------------------------------------------------------------------------------------------|----------------|------------|
| <b>Agricultural practices within the catchment</b> | Cultivated lands with orchards/vineyards                                                     | Absence        | 0          |
|                                                    |                                                                                              | <10%           | 1          |
|                                                    |                                                                                              | 10%–30%        | 2          |
|                                                    |                                                                                              | >30%           | 3          |
|                                                    | Awareness of the presence of drinking water supply/sources by agricultural workers           | Good awareness | 0          |
|                                                    |                                                                                              | No Awareness   | 2          |
| <b>Urban &amp; Industrial Discharge</b>            | Full compliance with Good Agricultural Practice Regulations verified by catchment inspection | Yes            | 0          |
|                                                    |                                                                                              | No             | 3          |
|                                                    | Septic tanks serving population                                                              | Absence        | 0          |
|                                                    |                                                                                              | Presence       | 2          |
|                                                    | Flooding of septic tanks on flood plains                                                     | Yes            | 2          |
|                                                    |                                                                                              | No             | 0          |
|                                                    | Pop equivalent served by all wastewater Works                                                | Absence        | 0          |
|                                                    |                                                                                              | <5000          | 1          |
|                                                    |                                                                                              | 5000–50,000    | 2          |
|                                                    |                                                                                              | >50,000        | 3          |
|                                                    | Presence of tourism infrastructures served by private on-site wastewater treatment systems   | Yes            | 2          |
|                                                    |                                                                                              | No             | 0          |
|                                                    | Presence of hospital                                                                         | Yes            | 3          |
|                                                    |                                                                                              | No             | 0          |
|                                                    | Presence of industries                                                                       | Yes            | 3          |
|                                                    |                                                                                              | No             | 0          |
|                                                    | Evidence of malfunction on one or more on-site wastewater treatment systems                  | Yes            | 3          |
|                                                    |                                                                                              | No             | 0          |
|                                                    | Presence of landfill sites in the catchment                                                  | Yes            | 3          |
|                                                    |                                                                                              | No             | 0          |
|                                                    | Wastewater works discharge distance from catchment point                                     | Absence        | 0          |
|                                                    |                                                                                              | >10 km         | 1          |
|                                                    |                                                                                              | ≤10 km         | 2          |

Table S1. Cont.

| Item                         | Factor                                                                                                                | Choice                                                          | Risk Score |
|------------------------------|-----------------------------------------------------------------------------------------------------------------------|-----------------------------------------------------------------|------------|
| Urban & Industrial Discharge | Storm water overflows                                                                                                 | Absence                                                         | 0          |
|                              |                                                                                                                       | Presence                                                        | 3          |
|                              | Integrated Pollution management plan discharge from intensive agricultural activity or agricultural related discharge | Yes                                                             | −1         |
|                              |                                                                                                                       | No                                                              | 2          |
|                              | All wastewater treatment plants complying with the Urban WasteWater Treatment Directive quality standards             | Yes                                                             | 0          |
|                              |                                                                                                                       | No                                                              | 2          |
|                              | UV inactivation at outlet of wastewater treatment plants                                                              | Yes                                                             | −1         |
| No                           |                                                                                                                       | 1                                                               |            |
| Catchment characteristics    | Water source type                                                                                                     | Upland reservoir/lake                                           | 1          |
|                              |                                                                                                                       | Lowland long term storage reservoir/lake                        | 2          |
|                              |                                                                                                                       | Upland river or stream—bank side storage                        | 2          |
|                              |                                                                                                                       | Upland river or stream—direct abstraction                       | 3          |
|                              |                                                                                                                       | Lowland river or stream—direct abstraction or bank side storage | 3          |
|                              | Slopes                                                                                                                | >10% near the catchment                                         | 2          |
|                              |                                                                                                                       | ≤10% near the catchment                                         | 0          |
|                              | DOC Trends                                                                                                            | Decreasing                                                      | −2         |
| Stable                       |                                                                                                                       | 0                                                               |            |
| Increasing                   |                                                                                                                       | 2                                                               |            |
| Catchment management         | Catchment inspections frequency                                                                                       | 1 per month or more                                             | −1         |
|                              |                                                                                                                       | Between monthly and annually                                    | 0          |
|                              |                                                                                                                       | 1 per year or less                                              | 1          |
|                              | Procedures in place to deal with irregularities on the catchment                                                      | In place                                                        | −1         |
|                              |                                                                                                                       | No procedure                                                    | 1          |
|                              | Catchment protection areas implementation                                                                             | In place                                                        | −1         |
|                              |                                                                                                                       | Procedure started                                               | 0          |
| Procedure not started        |                                                                                                                       | 1                                                               |            |

Note: \* LDI: Livestock Density Index

**Table S2.** Natural catchment Risk Assessment.

| Item                                               | Factor                                                                                       | Choice                                                     | Risk Score |
|----------------------------------------------------|----------------------------------------------------------------------------------------------|------------------------------------------------------------|------------|
| <b>Animals</b>                                     | Cattle/calves livestock unit per ha of forage area (LDI *)                                   | Absence                                                    | 0          |
|                                                    |                                                                                              | $\leq 1$                                                   | 1          |
|                                                    |                                                                                              | $> 1$                                                      | 3          |
|                                                    | Sheep/lambs livestock unit per ha of forage area (LDI *)                                     | Absence                                                    | 0          |
|                                                    |                                                                                              | $\leq 1$                                                   | 1          |
|                                                    |                                                                                              | $> 1$                                                      | 3          |
|                                                    | Pig livestock unit per ha of forage area (LDI *)                                             | Absence                                                    | 0          |
|                                                    |                                                                                              | $\leq 1$                                                   | 1          |
|                                                    |                                                                                              | $> 1$                                                      | 3          |
|                                                    | Poultry livestock unit per ha of forage area (LDI *)                                         | Absence                                                    | 0          |
|                                                    |                                                                                              | $\leq 1$                                                   | 1          |
|                                                    |                                                                                              | $> 1$                                                      | 3          |
|                                                    | Any other farmed animals or birds                                                            | Absence                                                    | 0          |
|                                                    |                                                                                              | Presence                                                   | 1          |
| <b>Agricultural practices within the catchment</b> | Evidence of wildlife around the catchment                                                    | Absence                                                    | 0          |
|                                                    |                                                                                              | Presence                                                   | 2          |
|                                                    | Animals access to water sources including feeder streams                                     | No access (natural or artificial barrier)                  | 0          |
|                                                    |                                                                                              | Access possible at a distance $> 200$ m from the catchment | 1          |
|                                                    |                                                                                              | Access possible at a distance $< 200$ m from the catchment | 3          |
|                                                    | Farm waste (Slurry/Dung) or sewage sludge spreading within the catchment                     | Absence                                                    | 0          |
|                                                    |                                                                                              | Presence                                                   | 3          |
|                                                    | Slurry/dung open stores                                                                      | Absence                                                    | 0          |
|                                                    |                                                                                              | Presence                                                   | 3          |
| <b>Agricultural practices within the catchment</b> | Awareness of the presence of drinking water supply/sources by agricultural workers           | Good awareness                                             | 0          |
|                                                    |                                                                                              | No Awareness                                               | 2          |
|                                                    | Full compliance with Good Agricultural Practice Regulations verified by catchment inspection | Yes                                                        | 0          |
|                                                    |                                                                                              | No                                                         | 3          |

Table S2. Cont.

| Item                         | Factor                                                                                                                | Choice         | Risk Score |
|------------------------------|-----------------------------------------------------------------------------------------------------------------------|----------------|------------|
| Urban & Industrial Discharge | Septic tanks serving population                                                                                       | Absence        | 0          |
|                              |                                                                                                                       | Presence       | 2          |
|                              | Flooding of septic tanks on flood plains                                                                              | Yes            | 2          |
|                              |                                                                                                                       | No             | 0          |
|                              | Presence of Wastewater Works                                                                                          | Yes            | 1          |
|                              |                                                                                                                       | No             | 0          |
|                              | Presence of tourism infrastructures served by private on-site wastewater treatment systems                            | Yes            | 2          |
|                              |                                                                                                                       | No             | 0          |
|                              | Presence of hospital                                                                                                  | Yes            | 3          |
|                              |                                                                                                                       | No             | 0          |
|                              | Presence of industries                                                                                                | Yes            | 3          |
|                              |                                                                                                                       | No             | 0          |
|                              | Evidence of malfunction on one or more on-site wastewater treatment systems                                           | Yes            | 3          |
|                              |                                                                                                                       | No             | 0          |
|                              | Presence of landfill sites in the catchment                                                                           | Yes            | 3          |
|                              |                                                                                                                       | No             | 0          |
|                              | Wastewater works discharge distance from catchment point (how much PE?)                                               | Absence        | 0          |
|                              |                                                                                                                       | >10 km         | 1          |
|                              |                                                                                                                       | ≤10 km         | 2          |
|                              | Storm water overflows                                                                                                 | Absence        | 0          |
|                              |                                                                                                                       | Presence       | 3          |
|                              | Integrated Pollution management plan discharge from intensive agricultural activity or agricultural related discharge | Non applicable | 0          |
|                              |                                                                                                                       | Yes            | −1         |
|                              |                                                                                                                       | No             | 2          |
|                              | All wastewater treatment plants complying with the Urban WasteWater Treatment Directive quality standards             | Non applicable | 0          |
|                              |                                                                                                                       | Yes            | 0          |
|                              |                                                                                                                       | No             | 2          |
|                              | UV inactivation at outlet of wastewater treatment plants                                                              | Non applicable | 0          |
|                              |                                                                                                                       | Yes            | −1         |
|                              |                                                                                                                       | No             | 1          |

Table S2. Cont.

| Item                      | Factor                                                           | Choice                                                          | Risk Score |
|---------------------------|------------------------------------------------------------------|-----------------------------------------------------------------|------------|
| Catchment characteristics | Water source type                                                | Upland reservoir/lake                                           | 1          |
|                           |                                                                  | Lowland long term storage reservoir/lake                        | 2          |
|                           |                                                                  | Upland river or stream—bank side storage                        | 2          |
|                           |                                                                  | Upland river or stream—direct abstraction                       | 3          |
|                           |                                                                  | Lowland river or stream—direct abstraction or bank side storage | 3          |
|                           | Slopes                                                           | >10% near the catchment                                         | 2          |
|                           |                                                                  | ≤10% near the catchment                                         | 0          |
|                           | DOC Trends                                                       | Decreasing                                                      | −2         |
|                           |                                                                  | Stable                                                          | 0          |
|                           |                                                                  | Increasing                                                      | 2          |
| Catchment management      | Catchment inspections frequency                                  | 1 per month or more                                             | −1         |
|                           |                                                                  | Between monthly and annually                                    | 0          |
|                           |                                                                  | 1 per year or less                                              | 1          |
|                           | Procedures in place to deal with irregularities on the catchment | In place                                                        | −1         |
|                           |                                                                  | No procedure                                                    | 1          |
|                           | Catchment protection areas implementation                        | In place                                                        | −1         |
|                           |                                                                  | Procedure started                                               | 0          |
|                           |                                                                  | Procedure not started                                           | 1          |

Note: \* LDI: Livestock Density Index

**Table S3.** Treatment Risk Assessment.

| Item                               | Factor                                                                 | Choice                                                          | Risk Score |
|------------------------------------|------------------------------------------------------------------------|-----------------------------------------------------------------|------------|
| <b>Water treatment processes</b>   | Water treatment processes                                              | Buffer tank                                                     | −1         |
|                                    |                                                                        | Simple sand filtration (not slow sand filtration)               | −1         |
|                                    |                                                                        | Coagulation with aluminium                                      | −2         |
|                                    |                                                                        | Coagulation with ferric chloride                                | −2         |
|                                    |                                                                        | DAF/sedimentation and filtration                                | −1         |
|                                    |                                                                        | Rapid gravity or pressure filtration                            | −2         |
|                                    |                                                                        | Slow sand filtration                                            | −2         |
|                                    |                                                                        | Granular activated carbon                                       | −2         |
|                                    |                                                                        | Powder activated carbon                                         | −2         |
|                                    |                                                                        | Membrane filtration (approved)                                  | −3         |
|                                    |                                                                        | Membrane filtration (not approved)                              | −2         |
|                                    |                                                                        | Chlorination (HClO, ClO <sub>2</sub> , Cl <sub>2</sub> gaseous) | −2         |
|                                    |                                                                        | UV disinfection                                                 | −2         |
|                                    |                                                                        | Nanofiltration                                                  | −2         |
|                                    |                                                                        | Ozonation                                                       | −2         |
| <b>Raw water intake management</b> | Water quality monitor                                                  | Not appropriate                                                 | 1          |
|                                    |                                                                        | Appropriate alarmed and connected to telemetry                  | −1         |
|                                    | Intake shut down when poor water quality                               | No                                                              | 1          |
|                                    |                                                                        | Manual                                                          | −1         |
|                                    |                                                                        | Automatic                                                       | −2         |
| <b>Treatment works monitoring</b>  | Coagulation : coagulant dose (and or pH) control                       | Absence                                                         | 2          |
|                                    |                                                                        | Manual control (not flow proportional)                          | 0          |
|                                    |                                                                        | Monitored and alarmed                                           | −1         |
|                                    | After clarification/Filtration—water turbidity meter/ particle counter | No turbidity meter or particle count                            | 1          |
|                                    |                                                                        | turbidity meter/particle count but no alarm on telemetry        | 0          |
|                                    |                                                                        | turbidity meter/particle count with alarm on telemetry          | −1         |

Table S3. Cont.

| Item                       | Factor                                                                                                             | Choice                                                        | Risk Score |
|----------------------------|--------------------------------------------------------------------------------------------------------------------|---------------------------------------------------------------|------------|
| Treatment works monitoring | After clarification/Filtration—monitoring for residual coagulant                                                   | Not monitored                                                 | 0          |
|                            |                                                                                                                    | Routine discrete monitoring for residual coagulant            | −1         |
|                            |                                                                                                                    | Continuous monitoring for residual                            | −2         |
|                            | Membrane filtration—Plant monitored for integrity                                                                  | Non applicable                                                | 0          |
|                            |                                                                                                                    | Not monitored                                                 | 1          |
|                            |                                                                                                                    | Plant monitored for integrity but not alarmed                 | 0          |
|                            |                                                                                                                    | Plant monitored and alarmed for integrity                     | −1         |
|                            | Membrane filtration—Particle counter used continuously to monitor filter performance                               | Non applicable                                                | 0          |
|                            |                                                                                                                    | Yes                                                           | −1         |
|                            |                                                                                                                    | No                                                            | 1          |
|                            | Disinfection—Plant monitored for integrity and correct dosage                                                      | Not monitored                                                 | 1          |
|                            |                                                                                                                    | Plant monitored for integrity and correct dosage but no alarm | 0          |
|                            |                                                                                                                    | Plant monitored and alarmed for integrity and correct dosage  | −1         |
| Filter performance         | Treated water turbidity increases range, excluding normal backwash period or turbidity in the final water >1.0 NTU | Less than 50%                                                 | 0          |
|                            |                                                                                                                    | More than 50%                                                 | 1          |
| Disinfection performance   | UV inactivation—Influent turbidity consistently                                                                    | <0.2 NTU                                                      | −2         |
|                            |                                                                                                                    | 0.2–1.0 NTU                                                   | −2         |
|                            |                                                                                                                    | >1.0 NTU                                                      | −1         |
|                            | Free chlorine residual consistently                                                                                | Not monitored or <0.1 mg/L                                    | 2          |
|                            |                                                                                                                    | 0.1–0.3 mg/L                                                  | −2         |
|                            |                                                                                                                    | >0.3 mg/L                                                     | 1          |
| Treatment works operation  | Plant with documented management systems that includes procedures and process maintenance/control manuals          | Yes—complete                                                  | −1         |
|                            |                                                                                                                    | Yes but incomplete                                            | 0          |
|                            |                                                                                                                    | No                                                            | 1          |
|                            | Process control manuals specific to works available                                                                | Yes—complete                                                  | −1         |
|                            |                                                                                                                    | Yes but incomplete                                            | 0          |
|                            |                                                                                                                    | No                                                            | 1          |

Table S3. Cont.

| Item                      | Factor                                                                                                             | Choice                       | Risk Score |
|---------------------------|--------------------------------------------------------------------------------------------------------------------|------------------------------|------------|
| Treatment works operation | Auditable action plans available for dealing with deviations in quality and evidence of implementation of the plan | Available—complete           | −1         |
|                           |                                                                                                                    | Available but incomplete     | 0          |
|                           |                                                                                                                    | Not available                | 1          |
|                           | WTP inspections carried out                                                                                        | >1 per month or more         | −1         |
|                           |                                                                                                                    | Between monthly and annually | 0          |
|                           |                                                                                                                    | 1 per year or less           | 1          |
|                           | Water flow through works when operating has increased by >10% in <30 min in last 12 months                         | Yes                          | 1          |
|                           |                                                                                                                    | No                           | 0          |
|                           | Flow through works above design flow for >10% of time in last 12 months                                            | Yes                          | 2          |
|                           |                                                                                                                    | No                           | 0          |
|                           | Flow through works >130% above design flow for >50% of time in last 12 months                                      | Yes                          | 2          |
|                           |                                                                                                                    | No                           | 0          |
|                           | Filters bypassed during the year                                                                                   | Yes                          | 1          |
|                           |                                                                                                                    | No                           | 0          |
